# Supplementary material
Source: Research Square preprint supplement (doi:10.21203/rs.3.rs-9715915/v1)
Supplement: Supplementary file 1 [file 16e08bd11c72f8209abc89ef.docx]

**Table S1.** Repeated measures ANOVA across microstate spectral power

|  | A | B | C | D | All | p | Group X MS interaction |
| --- | --- | --- | --- | --- | --- | --- | --- |
| Frontal Delta | 1.0189 (0.9673 to 1.0704) | 1.0172 (0.9644 to 1.0701) | 1.0361 (0.9815 to 1.0906) | 1.0308 (0.9756 to 1.0859) | 1.0278 (0.9744 to 1.0813) | 0.003 | 0.2236 |
| Central Delta | 0.8484 (0.7933 to 0.9034) | 0.8526 (0.7966 to 0.9085) | 0.8381 (0.7820 to 0.8943) | 0.8430 (0.7865 to 0.8995) | 0.8467 (0.7909 to 0.9025) | 0.008 | 0.2857 |
| Parietal Delta | 0.8629 (0.8043 to 0.9215) | 0.8616 (0.8017 to 0.9215) | 0.8893 (0.8300 to 0.9485) | 0.8767 (0.8163 to 0.9372) | 0.8738 (0.8144 to 0.9332) | <0.001 | 0.2236 |
| Occipital Delta | 0.992 (0.9282 to 1.0557) | 0.9745 (0.9102 to 1.0388) | 1.0079 (0.9436 to 1.0721) | 1.0468 (0.9792 to 1.1145) | 1.0074 (0.9425 to 1.0723) | <0.001 | 0.2236 |
| Temporal Delta | 1.1337 (1.0829 to 1.1845) | 1.1346 (1.0829 to 1.1864) | 1.1115 (1.0598 to 1.1632) | 1.1105 (1.0589 to 1.1622) | 1.1242 (1.0729 to 1.1755) | <0.001 | 0.2857 |
| Frontal Theta | 1.0752 (1.0141 to 1.1362) | 1.0661 (1.0048 to 1.1274) | 1.1118 (1.0458 to 1.1779) | 1.1341 (1.0663 to 1.2018) | 1.1002 (1.0362 to 1.1642) | <0.001 | 0.01 |
| Central Theta | 0.9841 (0.9168 to 1.0514) | 0.9897 (0.9215 to 1.0579) | 0.9401 (0.8749 to 1.0054) | 0.9916 (0.9232 to 1.0601) | 0.9787 (0.9116 to 1.0458) | <0.001 | 0.1267 |
| Parietal Theta | 1.0661 (0.9896 to 1.1426) | 1.0627 (0.9857 to 1.1396) | 1.0854 (1.0073 to 1.1636) | 1.0897 (1.0107 to 1.1688) | 1.078 (1.0005 to 1.1555) | <0.001 | 0.2236 |
| Occipital Theta | 1.182 (1.1072 to 1.2568) | 1.1421 (1.0682 to 1.2161) | 1.1871 (1.1115 to 1.2626) | 1.2813 (1.1979 to 1.3647) | 1.2042 (1.1272 to 1.2813) | <0.001 | 0.01 |
| Temporal Theta | 1.2892 (1.2251 to 1.3533) | 1.2895 (1.2241 to 1.3549) | 1.2221 (1.1600 to 1.2842) | 1.2404 (1.1763 to 1.3046) | 1.2632 (1.1994 to 1.3269) | <0.001 | 0.1267 |
| Frontal Alpha | 1.0062 (0.9504 to 1.0619) | 0.995 (0.9398 to 1.0502) | 1.0626 (1.0017 to 1.1235) | 1.0714 (1.0087 to 1.1341) | 1.0376 (0.9790 to 1.0962) | <0.001 | 0.2236 |
| Central Alpha | 0.9685 (0.9059 to 1.0310) | 0.978 (0.9153 to 1.0408) | 0.9219 (0.8606 to 0.9833) | 0.971 (0.9060 to 1.0361) | 0.9622 (0.8995 to 1.0249) | <0.001 | 0.691 |
| Parietal Alpha | 1.0866 (1.0146 to 1.1586) | 1.0894 (1.0184 to 1.1604) | 1.1131 (1.0390 to 1.1872) | 1.1019 (1.0274 to 1.1764) | 1.1 (1.0274 to 1.1727) | <0.001 | 0.3747 |
| Occipital Alpha | 1.1542 (1.0828 to 1.2256) | 1.1165 (1.0464 to 1.1866) | 1.1675 (1.0955 to 1.2394) | 1.2524 (1.1727 to 1.3321) | 1.179 (1.1057 to 1.2524) | <0.001 | 0.3747 |
| Temporal Alpha | 1.2715 (1.2163 to 1.3267) | 1.2776 (1.2211 to 1.3340) | 1.2009 (1.1459 to 1.2560) | 1.2114 (1.1544 to 1.2684) | 1.2433 (1.1877 to 1.2989) | <0.001 | 0.34 |
| Frontal Beta | 0.9943 (0.9455 to 1.0432) | 0.9823 (0.9327 to 1.0320) | 1.0375 (0.9869 to 1.0881) | 1.0286 (0.9786 to 1.0786) | 1.0121 (0.9625 to 1.0617) | <0.001 | 0.3729 |
| Central Beta | 0.9135 (0.8591 to 0.9678) | 0.9199 (0.8644 to 0.9754) | 0.8756 (0.8201 to 0.9312) | 0.9011 (0.8448 to 0.9574) | 0.9037 (0.8485 to 0.9590) | <0.001 | 0.0267 |
| Parietal Beta | 1.0866 (1.0146 to 1.1586) | 1.0894 (1.0184 to 1.1604) | 1.1131 (1.0390 to 1.1872) | 1.1019 (1.0274 to 1.1764) | 1.1 (1.0274 to 1.1727) | <0.001 | 0.2857 |
| Occipital Beta | 1.0066 (0.9477 to 1.0655) | 0.9594 (0.8991 to 1.0196) | 1.0012 (0.9431 to 1.0594) | 1.0701 (1.0072 to 1.1329) | 1.0135 (0.9540 to 1.0731) | <0.001 | 0.34 |
| Temporal Beta | 1.1676 (1.1230 to 1.2121) | 1.1609 (1.1154 to 1.2064) | 1.0986 (1.0535 to 1.1437) | 1.1035 (1.0580 to 1.1490) | 1.1351 (1.0903 to 1.1799) | <0.001 | 0.04 |

Data are expressed as mean (95% confidence interval). Greenhouse-Geisser p value was used as the epsilon of sphericity was lower than 0.75 for all analyses. Benjamini–Hochberg FDR correction was applied to correct multiple testing. MS: microstate

**Table S2.** Bayesian and Welch independent t-test between Parkinson vs Control groups

| Bayesian | |  | Welch's |  | 95% CI |  |
| --- | --- | --- | --- | --- | --- | --- |
|  | BF₁₀ | error % | p | Cohen's d | Lower | Upper |
| Frontal_Delta_A | 89.127 | 2.801×10-8 | < .001 | -0.66 | -1.01 | -0.305 |
| Central_Delta_A | 5.578 | 0.005 | 0.006 | -0.494 | -0.841 | -0.145 |
| Parietal_Delta_A | 65.956 | 3.983×10-8 | < .001 | -0.653 | -1.004 | -0.299 |
| Occipital_Delta_A | 138.479 | 1.666×10-8 | < .001 | -0.675 | -1.028 | -0.318 |
| Temporal_Delta_A | 47.661 | 5.798×10-8 | < .001 | -0.632 | -0.983 | -0.279 |
| Frontal_Theta_A | 80071.538 | 3.556×10-12 | < .001 | -0.993 | -1.356 | -0.626 |
| Central_Theta_A | 2578.481 | 3.996×10-10 | < .001 | -0.84 | -1.197 | -0.479 |
| Parietal_Theta_A | 25264.943 | 1.622×10-11 | < .001 | -0.941 | -1.303 | -0.576 |
| Occipital_Theta_A | 56571.462 | 5.326×10-12 | < .001 | -0.949 | -1.314 | -0.579 |
| Temporal_Theta_A | 66345.648 | 4.350×10-12 | < .001 | -0.967 | -1.331 | -0.598 |
| Frontal_Alpha_A | 392.826 | 4.675×10-9 | < .001 | -0.731 | -1.086 | -0.372 |
| Central_Alpha_A | 96.997 | 2.538×10-8 | < .001 | -0.647 | -1 | -0.29 |
| Parietal_Alpha_A | 76.813 | 3.336×10-8 | < .001 | -0.627 | -0.98 | -0.271 |
| Occipital_Alpha_A | 85.544 | 2.940×10-8 | < .001 | -0.627 | -0.98 | -0.27 |
| Temporal_Alpha_A | 211.731 | 9.955×10-9 | < .001 | -0.675 | -1.03 | -0.316 |
| Frontal_Beta_A | 0.704 | 0.018 | 0.088 | -0.306 | -0.649 | 0.039 |
| Central_Beta_A | 0.32 | 0.029 | 0.285 | -0.189 | -0.532 | 0.154 |
| Parietal_Beta_A | 0.346 | 0.028 | 0.284 | -0.197 | -0.539 | 0.147 |
| Occipital_Beta_A | 1.311 | 0.013 | 0.063 | -0.352 | -0.697 | -0.005 |
| Temporal_Beta_A | 2.974 | 0.007 | 0.022 | -0.428 | -0.774 | -0.079 |
| Frontal_Delta_B | 70.847 | 3.668×10-8 | < .001 | -0.636 | -0.988 | -0.281 |
| Central_Delta_B | 4.345 | 0.006 | 0.009 | -0.469 | -0.815 | -0.12 |
| Parietal_Delta_B | 50.456 | 5.415×10-8 | < .001 | -0.633 | -0.984 | -0.279 |
| Occipital_Delta_B | 211.795 | 9.952×10-9 | < .001 | -0.689 | -1.044 | -0.331 |
| Temporal_Delta_B | 32.624 | 8.852×10-8 | < .001 | -0.601 | -0.952 | -0.248 |
| Frontal_Theta_B | 16088.745 | 3.089×10-11 | < .001 | -0.911 | -1.273 | -0.546 |
| Central_Theta_B | 1334.011 | 9.696×10-10 | < .001 | -0.802 | -1.159 | -0.442 |
| Parietal_Theta_B | 15914.683 | 3.133×10-11 | < .001 | -0.914 | -1.275 | -0.549 |
| Occipital_Theta_B | 119750.277 | 2.361×10-12 | < .001 | -0.968 | -1.336 | -0.596 |
| Temporal_Theta_B | 24111.593 | 1.730×10-11 | < .001 | -0.918 | -1.281 | -0.551 |
| Frontal_Alpha_B | 208.033 | 1.018×10-8 | < .001 | -0.694 | -1.048 | -0.337 |
| Central_Alpha_B | 88.604 | 2.813×10-8 | < .001 | -0.638 | -0.991 | -0.282 |
| Parietal_Alpha_B | 69.359 | 3.760×10-8 | < .001 | -0.618 | -0.971 | -0.262 |
| Occipital_Alpha_B | 178.81 | 1.227×10-8 | < .001 | -0.658 | -1.013 | -0.299 |
| Temporal_Alpha_B | 129.446 | 1.804×10-8 | < .001 | -0.647 | -1.001 | -0.289 |
| Frontal_Beta_B | 0.646 | 0.019 | 0.094 | -0.297 | -0.64 | 0.048 |
| Central_Beta_B | 0.355 | 0.027 | 0.253 | -0.206 | -0.549 | 0.137 |
| Parietal_Beta_B | 0.389 | 0.026 | 0.249 | -0.214 | -0.557 | 0.13 |
| Occipital_Beta_B | 2.717 | 0.008 | 0.032 | -0.409 | -0.756 | -0.06 |
| Temporal_Beta_B | 2.202 | 0.009 | 0.029 | -0.405 | -0.751 | -0.058 |
| Frontal_Delta_C | 27.485 | 1.074×10-7 | 0.001 | -0.578 | -0.929 | -0.225 |
| Central_Delta_C | 2.679 | 0.008 | 0.017 | -0.433 | -0.778 | -0.085 |
| Parietal_Delta_C | 33.054 | 8.723×10-8 | < .001 | -0.604 | -0.955 | -0.252 |
| Occipital_Delta_C | 138.659 | 1.664×10-8 | < .001 | -0.666 | -1.02 | -0.309 |
| Temporal_Delta_C | 10.352 | 0.003 | 0.004 | -0.523 | -0.871 | -0.172 |
| Frontal_Theta_C | 12785.278 | 4.272×10-11 | < .001 | -0.905 | -1.266 | -0.54 |
| Central_Theta_C | 496.273 | 3.469×10-9 | < .001 | -0.757 | -1.112 | -0.399 |
| Parietal_Theta_C | 8938.505 | 7.012×10-11 | < .001 | -0.889 | -1.249 | -0.525 |
| Occipital_Theta_C | 99963.734 | 2.802×10-12 | < .001 | -0.972 | -1.338 | -0.601 |
| Temporal_Theta_C | 6865.5 | 1.028×10-10 | < .001 | -0.864 | -1.225 | -0.5 |
| Frontal_Alpha_C | 159.137 | 1.412×10-8 | < .001 | -0.68 | -1.034 | -0.323 |
| Central_Alpha_C | 52.282 | 5.200×10-8 | < .001 | -0.615 | -0.966 | -0.26 |
| Parietal_Alpha_C | 57.807 | 4.624×10-8 | 0.001 | -0.607 | -0.959 | -0.251 |
| Occipital_Alpha_C | 153.886 | 1.471×10-8 | < .001 | -0.655 | -1.01 | -0.297 |
| Temporal_Alpha_C | 77.753 | 3.289×10-8 | < .001 | -0.623 | -0.976 | -0.267 |
| Frontal_Beta_C | 0.613 | 0.02 | 0.096 | -0.292 | -0.636 | 0.052 |
| Central_Beta_C | 0.346 | 0.028 | 0.249 | -0.205 | -0.548 | 0.138 |
| Parietal_Beta_C | 0.392 | 0.026 | 0.249 | -0.216 | -0.559 | 0.128 |
| Occipital_Beta_C | 2.536 | 0.008 | 0.032 | -0.406 | -0.753 | -0.058 |
| Temporal_Beta_C | 2.169 | 0.009 | 0.027 | -0.407 | -0.753 | -0.06 |
| Frontal_Delta_D | 106.074 | 2.292×10-8 | < .001 | -0.667 | -1.02 | -0.312 |
| Central_Delta_D | 5.733 | 0.005 | 0.007 | -0.493 | -0.84 | -0.144 |
| Parietal_Delta_D | 106.655 | 2.277×10-8 | < .001 | -0.676 | -1.028 | -0.321 |
| Occipital_Delta_D | 183.767 | 1.187×10-8 | < .001 | -0.685 | -1.039 | -0.328 |
| Temporal_Delta_D | 39.204 | 7.212×10-8 | < .001 | -0.612 | -0.962 | -0.258 |
| Frontal_Theta_D | 147790.256 | 1.905×10-12 | < .001 | -1.007 | -1.373 | -0.638 |
| Central_Theta_D | 2644.483 | 3.866×10-10 | < .001 | -0.83 | -1.188 | -0.468 |
| Parietal_Theta_D | 32366.57 | 1.145×10-11 | < .001 | -0.941 | -1.303 | -0.574 |
| Occipital_Theta_D | 176063.003 | 1.637×10-12 | < .001 | -0.987 | -1.354 | -0.614 |
| Temporal_Theta_D | 50153.84 | 6.323×10-12 | < .001 | -0.945 | -1.31 | -0.576 |
| Frontal_Alpha_D | 405.957 | 4.472×10-9 | < .001 | -0.722 | -1.078 | -0.362 |
| Central_Alpha_D | 62.726 | 4.224×10-8 | < .001 | -0.615 | -0.967 | -0.259 |
| Parietal_Alpha_D | 94.567 | 2.616×10-8 | < .001 | -0.633 | -0.987 | -0.276 |
| Occipital_Alpha_D | 116.163 | 2.048×10-8 | < .001 | -0.637 | -0.991 | -0.279 |
| Temporal_Alpha_D | 193.097 | 1.118×10-8 | < .001 | -0.667 | -1.022 | -0.308 |
| Frontal_Beta_D | 0.646 | 0.019 | 0.093 | -0.298 | -0.641 | 0.047 |
| Central_Beta_D | 0.294 | 0.03 | 0.324 | -0.174 | -0.516 | 0.169 |
| Parietal_Beta_D | 0.431 | 0.025 | 0.229 | -0.228 | -0.571 | 0.116 |
| Occipital_Beta_D | 0.917 | 0.016 | 0.098 | -0.313 | -0.657 | 0.033 |
| Temporal_Beta_D | 2.596 | 0.008 | 0.024 | -0.42 | -0.766 | -0.072 |
| Frontal Delta All | 65.178 | 4.030×10-8 | < .001 | -0.634 | -0.986 | -0.279 |
| Central Delta All | 4.455 | 0.006 | 0.008 | -0.474 | -0.82 | -0.125 |
| Parietal Delta All | 58.886 | 4.539×10-8 | < .001 | -0.642 | -0.993 | -0.288 |
| Occipital Delta All | 170.229 | 1.301×10-8 | < .001 | -0.68 | -1.034 | -0.323 |
| Temporal Delta All | 28.225 | 1.044×10-7 | < .001 | -0.592 | -0.942 | -0.24 |
| Frontal Theta All | 41476.139 | 8.131×10-12 | < .001 | -0.956 | -1.319 | -0.589 |
| Central Theta All | 1629.636 | 7.365×10-10 | < .001 | -0.813 | -1.17 | -0.452 |
| Parietal Theta All | 20024.476 | 2.267×10-11 | < .001 | -0.924 | -1.286 | -0.559 |
| Occipital Theta All | 125175.449 | 2.274×10-12 | < .001 | -0.976 | -1.343 | -0.604 |
| Temporal Theta All | 30875.193 | 1.223×10-11 | < .001 | -0.929 | -1.293 | -0.562 |
| Frontal Alpha All | 273.826 | 7.321×10-9 | < .001 | -0.707 | -1.062 | -0.349 |
| Central Alpha All | 76.805 | 3.336×10-8 | < .001 | -0.631 | -0.984 | -0.275 |
| Parietal Alpha All | 76.918 | 3.330×10-8 | < .001 | -0.623 | -0.976 | -0.267 |
| Occipital Alpha All | 130.595 | 1.784×10-8 | < .001 | -0.644 | -0.999 | -0.286 |
| Temporal Alpha All | 155.967 | 1.446×10-8 | < .001 | -0.657 | -1.012 | -0.299 |
| Frontal Beta All | 0.659 | 0.019 | 0.092 | -0.3 | -0.643 | 0.045 |
| Central Beta All | 0.328 | 0.029 | 0.277 | -0.194 | -0.537 | 0.149 |
| Parietal Beta All | 0.393 | 0.026 | 0.249 | -0.216 | -0.559 | 0.128 |
| Occipital Beta All | 1.592 | 0.011 | 0.054 | -0.367 | -0.712 | -0.019 |
| Temporal Beta All | 2.643 | 0.008 | 0.024 | -0.421 | -0.767 | -0.072 |

Benjamini–Hochberg FDR correction was applied to correct multiple testing.

**Table S3.** Linear Regression between MoCA and microstate spectral power

| MoCA | A | B | C | D | All |
| --- | --- | --- | --- | --- | --- |
| Frontal Delta | -0.23 , 0.008 | -0.222 , 0.01 | -0.228 , 0.008 | -0.256 , 0.003 | -0.234 , 0.006 |
| Central Delta | -0.247 , 0.005 | -0.238 , 0.006 | -0.238 , 0.006 | -0.253 , 0.005 | -0.245 , 0.006 |
| Parietal Delta | -0.253 , 0.005 | -0.243 , 0.006 | -0.236 , 0.006 | -0.255 , 0.005 | -0.247 , 0.005 |
| Occipital Delta | -0.275 , 0.003 | -0.265 , 0.003 | -0.262 , 0.003 | -0.278 , 0.003 | -0.271 , 0.003 |
| Temporal Delta | -0.261 , 0.003 | -0.256 , 0.003 | -0.248 , 0.005 | -0.271 , 0.003 | -0.26 , 0.003 |
| Frontal Theta | -0.285 , 0.003 | -0.274 , 0.003 | -0.264 , 0.003 | -0.284 , 0.003 | -0.276 , 0.003 |
| Central Theta | -0.309 , 0.003 | -0.31 , 0.003 | -0.292 , 0.003 | -0.306 , 0.003 | -0.306 , 0.003 |
| Parietal Theta | -0.29 , 0.003 | -0.29 , 0.003 | -0.268 , 0.003 | -0.271 , 0.003 | -0.28 , 0.003 |
| Occipital Theta | -0.295 , 0.003 | -0.294 , 0.003 | -0.287 , 0.003 | -0.285 , 0.003 | -0.291 , 0.003 |
| Temporal Theta | -0.327 , 0.003 | -0.329 , 0.003 | -0.315 , 0.003 | -0.326 , 0.003 | -0.326 , 0.003 |
| Frontal Alpha | -0.133 , 0.163 | -0.135 , 0.163 | -0.12 , 0.202 | -0.115 , 0.222 | -0.124 , 0.186 |
| Central Alpha | -0.135 , 0.162 | -0.139 , 0.162 | -0.137 , 0.162 | -0.125 , 0.186 | -0.134 , 0.162 |
| Parietal Alpha | -0.093 , 0.329 | -0.095 , 0.321 | -0.086 , 0.356 | -0.085 , 0.356 | -0.09 , 0.337 |
| Occipital Alpha | -0.114 , 0.224 | -0.126 , 0.185 | -0.124 , 0.186 | -0.099 , 0.304 | -0.114 , 0.224 |
| Temporal Alpha | -0.126, 0.185 | -0.136 , 0.162 | -0.132 , 0.163 | -0.138 , 0.160 | -0.134 , 0.162 |
| Frontal Beta | -0.072, 0.418 | -0.094 , 0.328 | -0.076 , 0.404 | -0.084 , 0.361 | -0.081 , 0.377 |
| Central Beta | -0.024 , 0.8 | -0.035 , 0.708 | -0.05 , 0.587 | -0.041 , 0.665 | -0.037 , 0.692 |
| Parietal Beta | 0.028 , 0.768 | 0.006 , 0.939 | 0.023 , 0.8 | 0.01 , 0.913 | 0.017 , 0.853 |
| Occipital Beta | -0.074 , 0.412 | -0.1 , 0.304 | -0.091 , 0.337 | -0.065 , 0.471 | -0.081 , 0.377 |
| Temporal Beta | -0.053 , 0.558 | -0.073 , 0.412 | -0.087 , 0.352 | -0.098 , 0.304 | -0.077 , 0.398 |

Data are expressed as standardized coefficient, p value. Benjamini–Hochberg FDR correction was applied to correct multiple testing.

**Table S4.** Linear Regression between UPDRS and microstate spectral power

| UPDRS | A | B | C | D | All |
| --- | --- | --- | --- | --- | --- |
| Frontal Delta | 0.17, 0.126 | 0.175, 0.123 | 0.186, 0.111 | 0.185, 0.113 | 0.181, 0.116 |
| Central Delta | 0.203, 0.104 | 0.204, 0.104 | 0.212, 0.102 | 0.218, 0.102 | 0.211, 0.102 |
| Parietal Delta | 0.209, 0.102 | 0.217, 0.102 | 0.203, 0.104 | 0.213, 0.102 | 0.211, 0.102 |
| Occipital Delta | 0.191, 0.111 | 0.206, 0.104 | 0.199, 0.104 | 0.203, 0.104 | 0.2, 0.104 |
| Temporal Delta | 0.12, 0.288 | 0.126, 0.277 | 0.139, 0.243 | 0.143, 0.231 | 0.132, 0.260 |
| Frontal Theta | 0.149, 0.212 | 0.134, 0.258 | 0.138, 0.25 | 0.159, 0.192 | 0.145, 0.228 |
| Central Theta | 0.199, 0.109 | 0.177, 0.123 | 0.202, 0.104 | 0.208, 0.104 | 0.196, 0.109 |
| Parietal Theta | 0.197, 0.111 | 0.186, 0.116 | 0.158, 0.595 | 0.19, 0.113 | 0.188, 0.116 |
| Occipital Theta | 0.185, 0.116 | 0.166, 0.174 | 0.168, 0.165 | 0.179, 0.123 | 0.174, 0.126 |
| Temporal Theta | 0.106, 0.354 | 0.1, 0.374 | 0.111, 0.34 | 0.124, 0.288 | 0.109, 0.34 |
| Frontal Alpha | 0.053, 0.637 | 0.033, 0.777 | 0.015, 0.896 | 0.041, 0.72 | 0.034, 0.76 |
| Central Alpha | 0.114, 0.323 | 0.096, 0.395 | 0.115, 0.323 | 0.109, 0.34 | 0.108, 0.346 |
| Parietal Alpha | 0.072, 0.5 | 0.053, 0.637 | 0.037, 0.76 | 0.056, 0.6 | 0.053, 0.62 |
| Occipital Alpha | 0.103, 0.36 | 0.092, 0.395 | 0.074, 0.480 | 0.083, 0.420 | 0.086, 0.408 |
| Temporal Alpha | -0.008, 0.937 | -0.031, 0.8 | -0.013, 0.915 | -0.002, 0.985 | -0.016, 0.896 |
| Frontal Beta | 0.115, 0.315 | 0.114, 0.317 | 0.108, 0.34 | 0.113, 0.323 | 0.113, 0.323 |
| Central Beta | 0.176, 0.121 | 0.163, 0.172 | 0.196, 0.104 | 0.175, 0.121 | 0.179, 0.118 |
| Parietal Beta | 0.11, 0.34 | 0.103, 0.36 | 0.089, 0.420 | 0.101, 0.374 | 0.101, 0.374 |
| Occipital Beta | 0.126, 0.277 | 0.121, 0.288 | 0.111, 0.34 | 0.1, 0.374 | 0.115, 0.315 |
| Temporal Beta | 0.076, 0.480 | 0.07, 0.5 | 0.092, 0.395 | 0.103, 0.36 | 0.086, 0.408 |

Data are expressed as standardized coefficient, p value. Benjamini–Hochberg FDR correction was applied to correct multiple testing. MS

**Table S5.** Differences in microstate spectral power between groups

|  | CTL vs PD | CTL vs PDD | CTL vs PDMCI | PD vs PDD | PD vs PDMCI | PDD vs PDMCI |
| --- | --- | --- | --- | --- | --- | --- |
| Frontal_Delta_A | 1.59, 3.838 | 87.593, 211.469 | 2.374,  5.73 | 0.531, 1.283 | 0.1, 0.241 | 0.406, 0.98 |
| Central_Delta_A | 0.154, 0.371 | 62.04, 149.779 | 1.774, 4.284 | 3.164, 7.638 | 0.257, 0.621 | 0.278, 0.671 |
| Parietal_Delta_A | 0.592, 1.43 | 563.272, 1359.86 | 5.931, 14.318 | 1.351, 3.261 | 0.135, 0.327 | 0.505, 1.22 |
| Occipital_Delta_A | 0.484, 1.169 | 3081.056, 7438.328 | 6.639, 16.028 | 8.49, 20.497 | 0.164, 0.396 | 2.578, 6.225 |
| Temporal_Delta_A | 0.601, 1.45 | 88.974, 214.803 | 5.363, 12.948 | 1.032, 2.491 | 0.16, 0.387 | 0.252, 0.609 |
| Frontal_Theta_A | 69.223, 167.12 | 14699.57, 35487.9 | 410.887, 991.97 | 0.753, 1.818 | 0.14, 0.339 | 0.214, 0.516 |
| Central_Theta_A | 3.216, 7.765 | 3928.743, 9484.824 | 114.06, 275.365 | 3.2, 7.725 | 0.288, 0.696 | 0.229, 0.553 |
| Parietal_Theta_A | 20.252, 48.894 | 10279.37, 24816.59 | 289.689, 699.372 | 0.931, 2.247 | 0.144, 0.346 | 0.275, 0.665 |
| Occipital_Theta_A | 10.341, 24.965 | 67676.89, 163386.5 | 292.233, 705.514 | 3.707, 8.949 | 0.159, 0.383 | 0.968, 2.337 |
| Temporal_Theta_A | 33.942, 81.942 | 9699.064, 23415.61 | 304.564, 735.282 | 1.955, 4.72 | 0.168, 0.406 | 0.298, 0.719 |
| Frontal_Alpha_A | 7.133, 17.221 | 4.326, 10.444 | 15.578, 37.609 | 0.118, 0.285 | 0.104, 0.25 | 0.118, 0.286 |
| Central_Alpha_A | 1.496, 3.611 | 2.722, 6.572 | 9.803, 23.667 | 0.147, 0.356 | 0.135, 0.326 | 0.119, 0.286 |
| Parietal_Alpha_A | 2.57, 6.204 | 1.075, 2.594 | 4.165, 10.055 | 0.114, 0.275 | 0.1, 0.242 | 0.119, 0.288 |
| Occipital_Alpha_A | 2.57, 6.204 | 1.075, 2.594 | 4.165, 10.055 | 0.114, 0.275 | 0.1, 0.242 | 0.119, 0.288 |
| Temporal_Alpha_A | 6.244, 15.074 | 1.634, 3.944 | 4.243, 10.243 | 0.115, 0.278 | 0.097, 0.235 | 0.119, 0.287 |
| Frontal_Beta_A | 0.178, 0.429 | 0.446, 1.078 | 0.189, 0.456 | 0.146, 0.352 | 0.097, 0.234 | 0.145, 0.349 |
| Central_Beta_A | 0.112, 0.27 | 0.219, 0.529 | 0.119, 0.288 | 0.138, 0.332 | 0.097, 0.234 | 0.149, 0.359 |
| Parietal_Beta_A | 0.181, 0.436 | 0.141,  0.34 | 0.103, 0.248 | 0.117, 0.282 | 0.138, 0.332 | 0.132, 0.319 |
| Occipital_Beta_A | 0.167, 0.402 | 1.153, 2.784 | 0.243, 0.586 | 0.279, 0.674 | 0.1, 0.242 | 0.279, 0.673 |
| Temporal_Beta_A | 0.695, 1.678 | 0.697, 1.683 | 0.231, 0.557 | 0.125, 0.302 | 0.11, 0.266 | 0.164, 0.396 |
| Frontal_Delta_B | 1.336, 3.226 | 39.9, 96.328 | 1.789,  4.32 | 0.495, 1.194 | 0.098, 0.238 | 0.454, 1.095 |
| Central_Delta_B | 0.152, 0.367 | 25.774, 62.225 | 1.119, 2.702 | 2.636, 6.364 | 0.216, 0.521 | 0.309, 0.746 |
| Parietal_Delta_B | 0.577, 1.392 | 368.619, 889.925 | 3.419, 8.253 | 1.247, 3.01 | 0.119, 0.287 | 0.674, 1.628 |
| Occipital_Delta_B | 0.645, 1.558 | 1736.019, 4191.121 | 6.26, 15.112 | 6.731, 16.249 | 0.145, 0.349 | 3.268, 7.89 |
| Temporal_Delta_B | 0.461, 1.112 | 41.342, 99.808 | 4.058, 9.796 | 0.981, 2.369 | 0.161, 0.388 | 0.275, 0.663 |
| Frontal_Theta_B | 22.289, 53.811 | 2345.774, 5663.2 | 108.685, 262.39 | 0.714, 1.723 | 0.131, 0.316 | 0.235, 0.568 |
| Central_Theta_B | 2.025, 4.89 | 1770.305, 4273.895 | 67.306, 162.492 | 3.696, 8.922 | 0.306, 0.739 | 0.236, 0.57 |
| Parietal_Theta_B | 13.375, 32.291 | 7613.91, 18381.61 | 161.079, 388.88 | 1.259, 3.039 | 0.145, 0.349 | 0.33, 0.797 |
| Occipital_Theta_B | 13.561, 32.739 | 36677.7, 88547.8 | 459.854, 1110.187 | 3.443, 8.312 | 0.168, 0.406 | 0.935, 2.257 |
| Temporal_Theta_B | 15.397, 37.17 | 5075.543, 12253.45 | 138.512, 334.399 | 2.508, 6.055 | 0.166, 0.4 | 0.366, 0.884 |
| Frontal_Alpha_B | 3.963, 9.567 | 3.016, 7.281 | 12.056, 29.105 | 0.121, 0.292 | 0.108, 0.261 | 0.118, 0.286 |
| Central_Alpha_B | 1.337, 3.229 | 2.274,  5.49 | 9.747, 23.53 | 0.147, 0.356 | 0.144, 0.349 | 0.118, 0.286 |
| Parietal_Alpha_B | 2.14, 5.166 | 1.06,  2.558 | 3.849, 9.293 | 0.115, 0.278 | 0.102, 0.247 | 0.119, 0.287 |
| Occipital_Alpha_B | 1.376, 3.321 | 3.891, 9.394 | 9.296, 22.442 | 0.174, 0.42 | 0.132, 0.319 | 0.126, 0.305 |
| Temporal_Alpha_B | 3.587, 8.661 | 1.566,  3.78 | 3.443, 8.311 | 0.119, 0.287 | 0.099, 0.238 | 0.12, 0.289 |
| Frontal_Beta_B | 0.139, 0.335 | 0.634, 1.532 | 0.204, 0.492 | 0.19, 0.458 | 0.101, 0.244 | 0.159, 0.384 |
| Central_Beta_B | 0.139, 0.335 | 0.634, 1.532 | 0.204, 0.492 | 0.19, 0.458 | 0.101, 0.244 | 0.159, 0.384 |
| Parietal_Beta_B | 0.17, 0.411 | 0.177, 0.428 | 0.107, 0.257 | 0.114, 0.275 | 0.124, 0.299 | 0.155, 0.375 |
| Occipital_Beta_B | 0.213, 0.514 | 2.301, 5.556 | 0.323,  0.78 | 0.414, 0.999 | 0.101, 0.244 | 0.433, 1.047 |
| Temporal_Beta_B | 0.415, 1.001 | 1.005, 2.427 | 0.219, 0.528 | 0.157, 0.379 | 0.102, 0.246 | 0.2,  0.483 |
| Frontal_Delta_C | 0.766, 1.85 | 25.172, 60.77 | 0.917, 2.214 | 0.634, 1.531 | 0.098, 0.237 | 0.533, 1.287 |
| Central_Delta_C | 0.118, 0.285 | 25.598, 61.8 | 0.944,  2.28 | 4.27, 10.309 | 0.275, 0.664 | 0.301, 0.727 |
| Parietal_Delta_C | 0.453, 1.093 | 140.921, 340.213 | 2.92,  7.049 | 1.216, 2.937 | 0.132, 0.318 | 0.463, 1.118 |
| Occipital_Delta_C | 0.547, 1.322 | 1086.557, 2623.18 | 4.488, 10.834 | 7.974, 19.25 | 0.152, 0.366 | 2.186, 5.278 |
| Temporal_Delta_C | 0.249, 0.602 | 17.908, 43.234 | 1.65,  3.985 | 1.408, 3.398 | 1.0.18, 0.434 | 0.278, 0.672 |
| Frontal_Theta_C | 20.397, 49.243 | 2062.461, 4979.22 | 107.222, 258.856 | 0.535, 1.293 | 0.13, 0.313 | 0.202, 0.487 |
| Central_Theta_C | 1.206, 2.911 | 1056.82, 2551.389 | 41.661, 100.579 | 2.775, 6.7 | 0.286, 0.692 | 0.231, 0.558 |
| Parietal_Theta_C | 10.739, 25.927 | 2514.768, 6071.187 | 137.663, 332.348 | 0.752, 1.815 | 0.149, 0.36 | 0.226, 0.547 |
| Occipital_Theta_C | 13.518, 32.636 | 58237.1, 140596.8 | 557.082, 1344.914 | 2.684, 6.481 | 0.174, 0.42 | 0.608, 1.469 |
| Temporal_Theta_C | 7.267, 17.544 | 1423.87, 3437.526 | 90.579, 218.677 | 1.579, 3.812 | 0.173, 0.418 | 0.29, 0.699 |
| Frontal_Alpha_C | 3.668, 8.856 | 1.819, 4.392 | 11.968, 28.894 | 0.115, 0.277 | 0.112, 0.271 | 0.124,  0.3 |
| Central_Alpha_C | 0.872, 2.105 | 2.414, 5.827 | 9.117, 22.011 | 0.167, 0.403 | 0.17, 0.41 | 0.118, 0.286 |
| Parietal_Alpha_C | 1.92, 4.634 | 0.749, 1.808 | 4.188, 10.11 | 0.114, 0.274 | 0.109, 0.263 | 0.127, 0.306 |
| Occipital_Alpha_C | 1.267, 3.058 | 3.466, 8.368 | 11.315, 27.316 | 0.16, 0.386 | 0.144, 0.348 | 0.119, 0.287 |
| Temporal_Alpha_C | 2.148, 5.185 | 1.159, 2.799 | 4.314, 10.415 | 0.119, 0.288 | 0.109, 0.262 | 0.119, 0.286 |
| Frontal_Beta_C | 0.156, 0.376 | 0.404, 0.975 | 0.201, 0.484 | 0.146, 0.351 | 0.099, 0.238 | 0.136, 0.328 |
| Central_Beta_C | 0.101, 0.245 | 0.33,  0.798 | 0.141,  0.34 | 0.189, 0.456 | 0.102, 0.247 | 0.164, 0.396 |
| Parietal_Beta_C | 0.185, 0.448 | 0.145,  0.35 | 0.112, 0.271 | 0.116, 0.28 | 0.121, 0.291 | 0.125, 0.303 |
| Occipital_Beta_C | 0.216, 0.521 | 1.611,  3.89 | 0.366, 0.883 | 0.28, 0.675 | 0.102, 0.246 | 0.276, 0.667 |
| Temporal_Beta_C | 0.296, 0.714 | 1.106, 2.671 | 0.32,  0.774 | 0.181, 0.437 | 0.097, 0.235 | 0.175, 0.423 |
| Frontal_Delta_D | 1.264, 3.051 | 258.021, 622.917 | 2.504, 6.044 | 1.172, 2.829 | 0.103, 0.248 | 0.759, 1.831 |
| Central_Delta_D | 0.149, 0.36 | 74.294, 179.363 | 1.524, 3.678 | 5.872, 14.177 | 0.268, 0.647 | 0.355, 0.856 |
| Parietal_Delta_D | 0.692, 1.671 | 905.993, 2187.259 | 7.295, 17.61 | 1.651, 3.987 | 0.135, 0.325 | 0.65, 1.569 |
| Occipital_Delta_D | 0.547, 1.32 | 2441.002, 5893.101 | 7.137, 17.231 | 9.941, 24.001 | 0.168, 0.405 | 2.568, 6.199 |
| Temporal_Delta_D | 0.445, 1.074 | 109.113, 263.421 | 3.624, 8.748 | 2.15, 5.192 | 0.168, 0.406 | 0.386, 0.931 |
| Frontal_Theta_D | 54.425, 131.393 | 24182.27, 58381.17 | 657.39, 1587.081 | 1.047, 2.528 | 0.165, 0.398 | 0.22,  0.53 |
| Central_Theta_D | 2.261, 5.458 | 3175.146, 7665.481 | 123.986, 299.328 | 4.6, 11.105 | 0.354, 0.856 | 0.249,  0.6 |
| Parietal_Theta_D | 18.741, 45.245 | 4832.607, 11666.95 | 349.149, 842.92 | 0.778, 1.879 | 0.165, 0.398 | 0.208, 0.503 |
| Occipital_Theta_D | 15.753, 38.031 | 44510.06, 107456.8 | 786.965, 1899.901 | 2.894, 6.987 | 0.194, 0.469 | 0.545, 1.316 |
| Temporal_Theta_D | 17.999, 43.455 | 7370.596, 17794.19 | 272.265, 657.306 | 2.867, 6.923 | 0.193, 0.466 | 0.344, 0.83 |
| Frontal_Alpha_D | 7.169, 17.306 | 2.246, 5.423 | 15.769, 38.069 | 0.114, 0.275 | 0.105, 0.254 | 0.123, 0.296 |
| Central_Alpha_D | 1.006, 2.428 | 1.78,  4.297 | 7.885, 19.037 | 0.15, 0.363 | 0.154, 0.372 | 0.118, 0.286 |
| Parietal_Alpha_D | 2.813, 6.791 | 0.779, 1.881 | 5.53, 13.351 | 0.114, 0.274 | 0.106, 0.255 | 0.131, 0.315 |
| Occipital_Alpha_D | 1.374, 3.317 | 2.059, 4.972 | 7.21, 17.407 | 0.138, 0.334 | 0.125, 0.302 | 0.118, 0.286 |
| Temporal_Alpha_D | 3.626, 8.754 | 1.716, 4.143 | 5.967, 14.405 | 0.121, 0.293 | 0.105, 0.253 | 0.118, 0.286 |
| Frontal_Beta_D | 0.151, 0.365 | 0.553, 1.335 | 0.194, 0.468 | 0.165, 0.399 | 0.098, 0.237 | 0.154, 0.371 |
| Central_Beta_D | 0.097, 0.233 | 0.266, 0.643 | 0.123, 0.298 | 0.185, 0.446 | 0.101, 0.245 | 0.165, 0.398 |
| Parietal_Beta_D | 0.183, 0.443 | 0.158, 0.382 | 0.118, 0.285 | 0.114, 0.275 | 0.114, 0.274 | 0.128, 0.31 |
| Occipital_Beta_D | 0.145, 0.35 | 0.655, 1.582 | 0.202, 0.487 | 0.246, 0.595 | 0.1, 0.242 | 0.255, 0.617 |
| Temporal_Beta_D | 0.318, 0.768 | 1.395, 3.368 | 0.322, 0.777 | 0.208, 0.502 | 0.097, 0.234 | 0.2,  0.482 |
| Frontal Delta All | 1.175, 2.837 | 65.197, 157.4 | 1.672, 4.036 | 0.682, 1.647 | 0.099, 0.24 | 0.541, 1.307 |
| Central Delta All | 0.142, 0.342 | 42.3, 102.121 | 1.32,  3.187 | 3.872, 9.347 | 0.255, 0.616 | 0.31, 0.747 |
| Parietal Delta All | 0.569, 1.374 | 398.243, 961.444 | 4.549, 10.982 | 1.376, 3.321 | 0.13, 0.314 | 0.568, 1.371 |
| Occipital Delta All | 0.555, 1.341 | 2003.421, 4836.686 | 6.136, 14.813 | 8.492, 20.501 | 0.157, 0.38 | 2.66, 6.421 |
| Temporal Delta All | 0.409, 0.987 | 49.52, 119.552 | 3.408, 8.227 | 1.318, 3.182 | 0.169, 0.408 | 0.291, 0.702 |
| Frontal Theta All | 36.75, 88.723 | 6296.896, 15202.05 | 237.952, 574.467 | 0.736, 1.778 | 0.141, 0.34 | 0.215, 0.519 |
| Central Theta All | 2.13, 5.142 | 2364.294, 5707.912 | 87.995, 212.438 | 3.599, 8.688 | 0.316, 0.762 | 0.234, 0.566 |
| Parietal Theta All | 15.792, 38.126 | 5662.641, 13670.83 | 231.16, 558.07 | 0.906, 2.188 | 0.151, 0.365 | 0.251, 0.606 |
| Occipital Theta All | 14.083, 33.999 | 53014.99, 127989.5 | 573.544, 1384.658 | 3.165, 7.641 | 0.178, 0.429 | 0.695, 1.677 |
| Temporal Theta All | 17.206, 41.539 | 5097.646, 12306.81 | 194.27, 469.01 | 2.207, 5.328 | 0.176, 0.424 | 0.322, 0.777 |
| Frontal Alpha All | 5.34, 12.891 | 2.523, 6.091 | 13.946, 33.669 | 0.115, 0.279 | 0.107, 0.259 | 0.12, 0.291 |
| Central Alpha All | 1.179, 2.847 | 2.244, 5.417 | 9.512, 22.963 | 0.151, 0.365 | 0.15, 0.362 | 0.118, 0.286 |
| Parietal Alpha All | 2.388, 5.764 | 0.888, 2.144 | 4.56, 11.009 | 0.114, 0.274 | 0.104, 0.252 | 0.123, 0.297 |
| Occipital Alpha All | 1.267, 3.059 | 2.919, 7.046 | 8.54, 20.618 | 0.155, 0.374 | 0.132, 0.319 | 0.12, 0.291 |
| Temporal Alpha All | 3.859, 9.317 | 1.512, 3.651 | 4.582, 11.061 | 0.118, 0.285 | 0.101, 0.244 | 0.118, 0.286 |
| Frontal Beta All | 0.156, 0.377 | 0.501, 1.209 | 0.198, 0.478 | 0.159, 0.384 | 0.098, 0.238 | 0.147, 0.354 |
| Central Beta All | 0.105, 0.253 | 0.263, 0.636 | 0.128, 0.308 | 0.162, 0.391 | 0.098, 0.238 | 0.157, 0.38 |
| Parietal Beta All | 0.183, 0.442 | 0.154, 0.371 | 0.11,  0.265 | 0.114, 0.276 | 0.124, 0.299 | 0.133, 0.321 |
| Occipital Beta All | 0.178, 0.431 | 1.199, 2.895 | 0.267, 0.644 | 0.29, 0.699 | 0.101, 0.243 | 0.295, 0.713 |
| Temporal Beta All | 0.178, 0.431 | 1.199, 2.895 | 0.267, 0.644 | 0.29, 0.699 | 0.101, 0.243 | 0.295, 0.713 |

Data are expressed as posterior odds, BF10.  The posterior odds have been corrected for multiple testing by fixing to 0.5 the prior probability that the null hypothesis holds across all comparisons. Individual comparisons are based on the default t-test with a Cauchy (0, r = 1/sqrt(2)) prior.
